# Supplementary material for: New insight into the promotion effect of Cu doped V2O5/WO3–TiO2 for low temperature NH3-SCR performance
Source: Royal Society of Chemistry journal article supplement (doi:10.1039/c5ra04940g), 2015-01-01
Supplement: c5ra04940g1.pdf [file c5ra04940g1.pdf]

## Supporting Information

### **New insight into the promotion effect of Cu doped V<sub>2</sub>O<sub>5</sub>/WO<sub>3</sub>-TiO<sub>2</sub> for low temperature NH<sub>3</sub>-SCR performance**

Meiqing Shen,<sup>a,b,c</sup> Chenxu Li,<sup>a</sup> Jianqiang Wang,<sup>\*a</sup> Lili Xu,<sup>a</sup> Wulin Wang<sup>a</sup> and Jun Wang<sup>\*a</sup>

<sup>a</sup> Key Laboratory for Green Chemical Technology of State Education Ministry, School of Chemical Engineering & Technology, Tianjin University, Tianjin 300072, PR China

<sup>b</sup> Collaborative Innovation Center of Chemical Science and Engineering (Tianjin), Tianjin 300072, PR China

<sup>c</sup> State Key Laboratory of Engines, Tianjin University, Tianjin 300072, PR China

\* Corresponding author: Jun Wang, Jianqiang Wang

Postal address:

School of Chemical Engineering and Technology, Tianjin University, 92 Weijin Road, Nankai District, Tianjin 300072, China

Email: jianqiangwang@tju.edu.cn; wangjun@tju.edu.cn

Tel. /Fax. : (+86) 22-27407002

## NH<sub>3</sub>-SCR performance without H<sub>2</sub>O

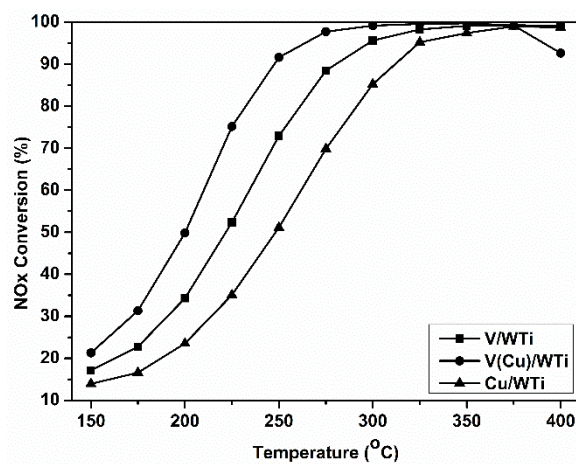

**Fig.S1** NH<sub>3</sub>-SCR performance on V/WTi, V(Cu)/WTi and Cu/WTi catalysts without H<sub>2</sub>O. 500

ppm NH<sub>3</sub>, 500 ppm NO, 5 % O<sub>2</sub> and N<sub>2</sub> balance, GHSV=10,000 h<sup>-1</sup>.

**Table S1** surface coverages of Vanadium species on catalysts

| Samples   | S <sub>BET</sub><br>(m <sup>2</sup> /g) | V<br>(μmol/m <sup>2</sup> ) |
|-----------|-----------------------------------------|-----------------------------|
| V/WTi     | 41                                      | 2.7                         |
| V(Cu)/WTi | 37                                      | 2.9                         |

## Raman

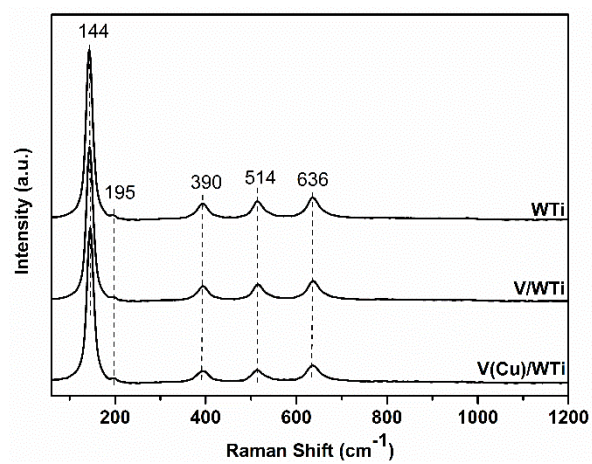

Fig.S2 Raman spectra of the catalysts

## XPS

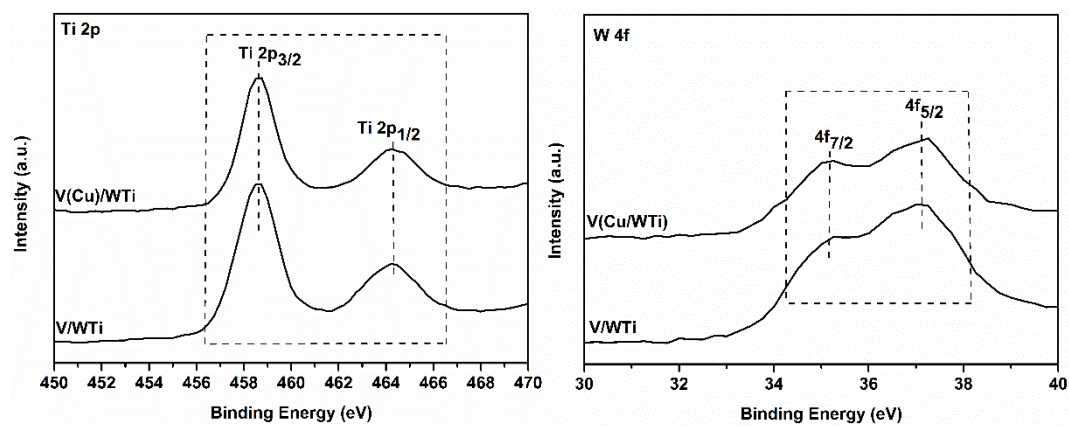

Fig.S3 XPS spectra of the obtained samples: Ti 2p, W 4f.

## Reaction between NO+O<sub>2</sub> and adsorbed NH<sub>3</sub> species

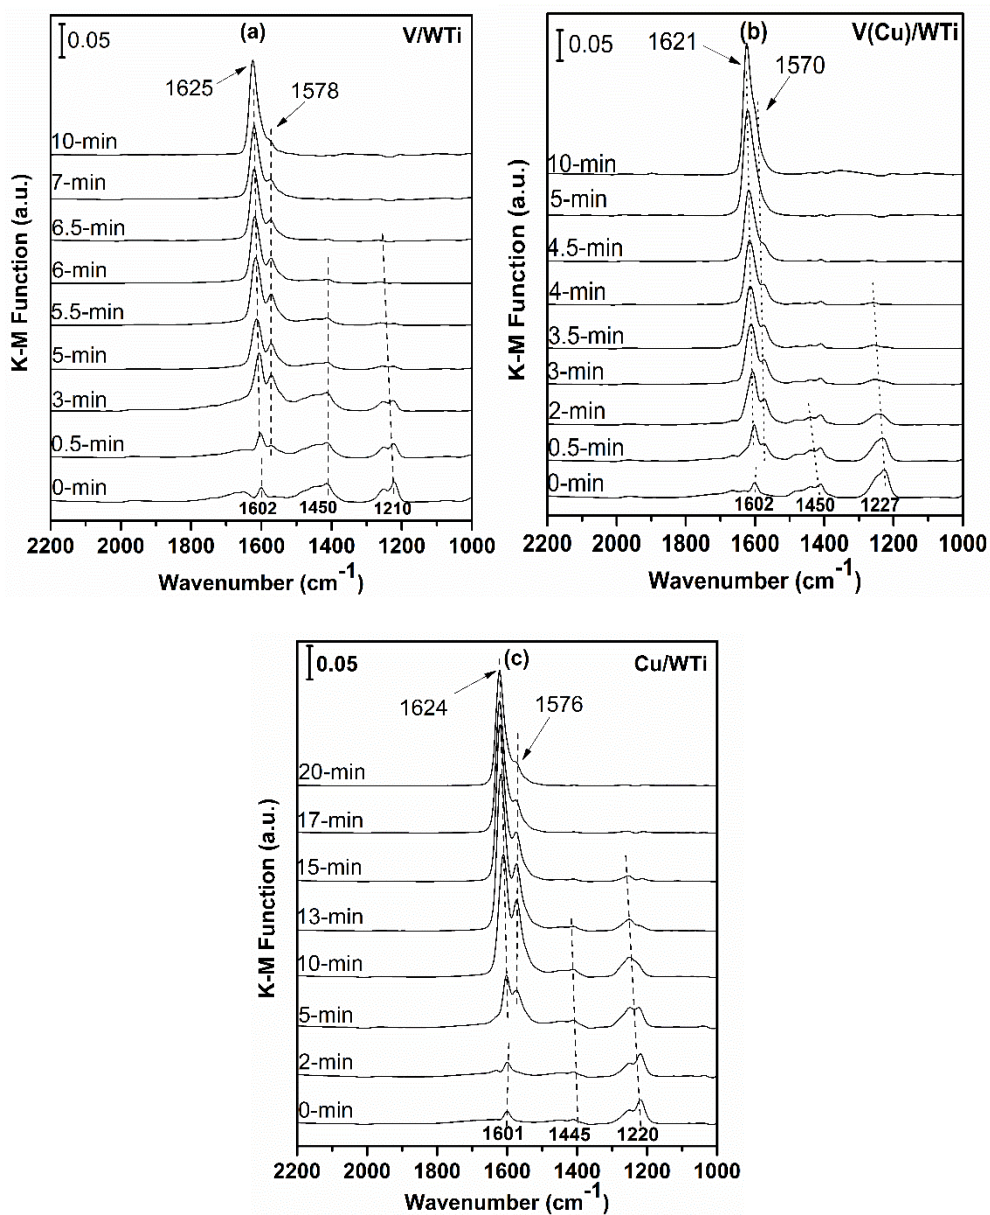

Fig.S4 DRIFTS spectra of catalysts pretreated with 3000 ppm NH<sub>3</sub>, followed by exposed to 3000 ppm NO+4 % O<sub>2</sub> as a function of time at 200°C.

For V/WTi sample, after NH<sub>3</sub> were pre-adsorbed and N<sub>2</sub> purging for 30 min, the coordinate NH<sub>3</sub> lined to Lewis acid sites (1602 and 1210 cm<sup>-1</sup>) and Brønsted (1672 and 1450 cm<sup>-1</sup>) acid sites form on the surface. After NO+O<sub>2</sub> introduced, the intensities of

all bands assigned to  $\text{NH}_3$  species decrease. Meanwhile, some new bands attributed to adsorbed nitrate species ( $1625$  and  $1578\text{ cm}^{-1}$ ) appear. The result indicates the adsorbed  $\text{NH}_3$  species are reactive in the  $\text{NH}_3$ -SCR process. For Cu/WTi sample, similar bands due to  $\text{NH}_3$  adsorption species are observed, introducing  $\text{NO}+\text{O}_2$  results in the  $\text{NH}_3$  adsorption species decreasing slowly, accompanying the appearance of nitrates species ( $1624$  and  $1576\text{ cm}^{-1}$ ). For V(Cu)/WTi sample, the similar phenomenon can be observed during the process. But the consumption rate of the  $\text{NH}_3$  adsorption species linked to the Lewis sites distinguishes from other catalysts.

### $\text{NH}_3+\text{NO}+\text{O}_2$ reaction

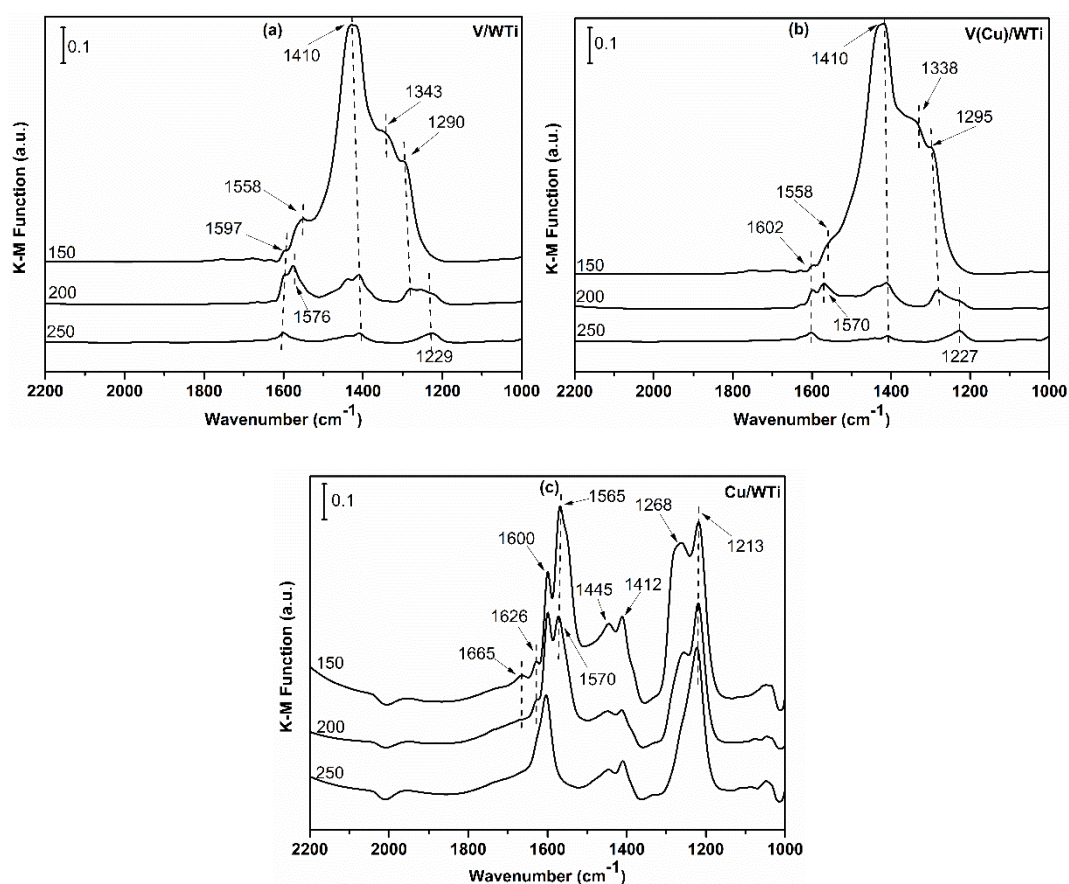

**Fig.S5** DRIFTS spectra of catalysts in a flowing of  $\text{NH}_3+\text{NO}+\text{O}_2$  at  $150$ ,  $200$  and  $250^\circ\text{C}$ .

To investigate the surface species on the catalyst under the steady-state condition, DRIFTS spectra were recorded in a flow of  $\text{NO}+\text{NH}_3+\text{O}_2$  from 150 to 250 °C. On the V/WTi sample, bands due to nitrates ( $1290\text{ cm}^{-1}$ ), coordinated  $\text{NH}_4^+$  ( $1434\text{ cm}^{-1}$ ),  $-\text{NH}_2$  species ( $1558\text{ cm}^{-1}$ ) and  $\text{NH}_3$  ( $1597\text{ cm}^{-1}$ ) are observed at 150 °C. In addition, a new band appears at  $1343\text{ cm}^{-1}$ , which is significantly different from the adsorbed nitrates and  $\text{NH}_3$  species mentioned above, which can be attributed to the intermediates species converted by surface adsorbed  $\text{NH}_3$  and  $\text{NO}_x$  species<sup>1, 2</sup>. With the increasing of temperature to 250 °C, the intermediates species ( $1343\text{ cm}^{-1}$ ) and the nitrates ( $1290\text{ cm}^{-1}$ ) vanished completely with the  $\text{NH}_4^+$  ( $1434\text{ cm}^{-1}$ ) diminishing quickly. During the process,  $-\text{NH}_2$  species ( $1558\text{ cm}^{-1}$ ) disappear with nitrates ( $1576\text{ cm}^{-1}$ ) appearing, and then only adsorbed  $\text{NH}_3$  species ( $1597$  and  $1229\text{ cm}^{-1}$ ) still exist at 250 °C. In regard with the V(Cu)/WTi sample, the similar process can be observed. While the intensities of  $-\text{NH}_2$  species ( $1558\text{ cm}^{-1}$ ) are obviously weaker than those of V/WTi sample, which indicates that  $-\text{NH}_2$  species ( $1558\text{ cm}^{-1}$ ) adsorbed on the V(Cu)/WTi are higher active than those of V/WTi sample. The intensities of  $-\text{NH}_2$  species almost vanished at 200 °C due to the rapid consumption by the  $\text{NO}_x$  reagent, which is in agreement with the results of reaction between  $\text{NO}+\text{O}_2$  and adsorbed  $\text{NH}_3$  species. Meanwhile, the band of nitrates species at  $1570\text{ cm}^{-1}$  appears and the intensities of them are obviously weaker than those of V/WTi sample, which may be caused by the competitive adsorption between  $\text{NH}_3$  and  $\text{NO}+\text{O}_2$  or the weaker adsorbed nitrates on the catalyst surface. Therefore it is beneficial for the reaction between adsorbed  $\text{NH}_3$  species and the gas NO or weak

adsorbed NO according to the E-R mechanism imposed by Topsøe<sup>3</sup>. In view of Cu/WTi sample, it is clear that no intermediates species (1335 cm<sup>-1</sup>) can be observed and large amounts of –NH<sub>2</sub> species (1565 cm<sup>-1</sup>) exist on the catalyst surface at 150°C, which strongly indicates the weakest NH<sub>3</sub>-SCR performance among the three catalysts at low temperature.

### Notes and references

1. L. Chen, J. Li and M. Ge, *Environ. Sci. Technol.*, 2010, **44**, 9590-9596.
2. X. Yao, L. Zhang, L. Li, L. Liu, Y. Cao, X. Dong, F. Gao, Y. Deng, C. Tang, Z. Chen, L. Dong and Y. Chen, *Appl. Catal., B*, 2014, **150–151**, 315-329.
3. J. A. Dumesic, N. Y. Topsøe, H. Topsøe, Y. Chen and T. Slabiak, *J. Catal.*, 1996, **163**, 409-417.
